# Supplementary material for: Heritability and Genetic Parameters for Semen Traits in Australian Sheep
Source: MDPI journal article supplement (doi:10.3390/ani12212946), 2022-10-26
Supplement: s1 [file s1]

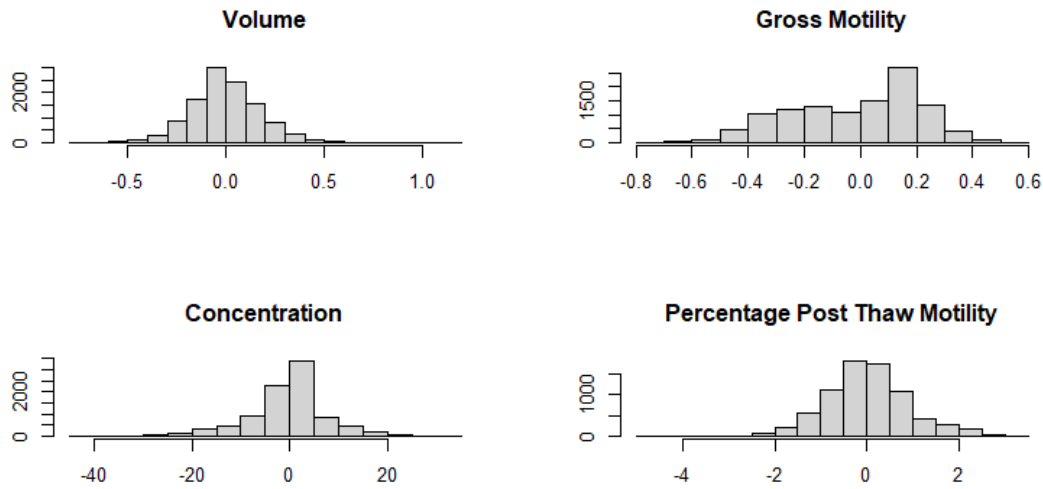

**Supplementary Figure S1.** Histograms displaying the skew of data of residuals from WOMBAT for transformed values for four ejaculate quality traits; A) volume, B) gross motility, C) concentration, D) percentage post that motility.

**Supplementary Table S1.** Significance of fitted covariates for each ejaculate trait

|                   | Volume | Gross Motility | Concentration | Percentage Post Thaw Motility |
|-------------------|--------|----------------|---------------|-------------------------------|
| Breed             | ***    | **             | ***           | ***                           |
| Age at collection | ***    | ***            | ***           | ***                           |
| Collection centre | ***    | ***            | ***           | NS                            |
| Collection number | ***    | NS             | ***           | ***                           |
| Season            | ***    | ***            | ***           | ***                           |
| Collection method | ***    | NS             | NS            | NS                            |

Note: \*\*\* = ( $p < 0.001$ ), \*\* = ( $p < 0.01$ ), \* = ( $p < 0.05$ ), and NS = ( $p > 0.05$ )

**Supplementary Table S2.** Across study comparison of previously published estimates of heritability and corresponding repeatability for ejaculate quality traits including volume, gross motility, concentration, and percentage post thaw motility

| Species     | Number of Animals | Number of Breeds | Number of Records  | Sampling Period (years) | Number of AI Centres | Heritability Estimate | Repeatability | Reference |
|-------------|-------------------|------------------|--------------------|-------------------------|----------------------|-----------------------|---------------|-----------|
| Volume (ml) |                   |                  |                    |                         |                      |                       |               |           |
| Sheep       | 483               | 2                | 483 (2 age groups) | 1992 – 1993             | 1                    | 0.07 – 0.11           | NA            | [14]      |

|                                      |       |    |                    |             |    |             |             |      |
|--------------------------------------|-------|----|--------------------|-------------|----|-------------|-------------|------|
| Sheep                                | 3,289 | 5  | 96,790             | 2003 – 2009 | 2  | 0.08 – 0.20 | 0.21 – 0.30 | [13] |
| Cattle                               | 787   | 16 | 35,573             | 2000 - 2015 | 1  | 0.02        | 0.33        | [18] |
| Pigs                                 | 2,862 | 19 | 210,733            | 1990 - 1997 | 31 | 0.58        | NA          | [19] |
| Pigs                                 | 3,675 | 14 | 215,830            | 2000 – 2005 | 23 | 0.14 – 0.25 | 0.43 – 0.46 | [35] |
| Gross Motility (0-5)                 |       |    |                    |             |    |             |             |      |
| Sheep                                | 483   | 2  | 483 (2 age groups) | 1992 – 1993 | 1  | 0.32 – 0.27 | NA          | [14] |
| Sheep                                | 3,289 | 5  | 96,790             | 2003 – 2009 | 2  | 0.01 – 0.11 | 0.08 – 0.20 | [13] |
| Cattle                               | 787   | 16 | 31,585             | 2000 - 2015 | 1  | 0.37        | 0.38        | [18] |
| Pigs                                 | 2,862 | 19 | 210,733            | 1990 - 1997 | 31 | NA          | NA          | [19] |
| Pigs                                 | 3,675 | 14 | 215,830            | 2000 – 2005 | 23 | NA          | NA          | [35] |
| Concentration (x10 <sup>6</sup> /mL) |       |    |                    |             |    |             |             |      |
| Sheep                                | 483   | 2  | 483 (2 age groups) | 1992 – 1993 | 1  | NA – 0.17   | NA          | [14] |
| Sheep                                | 3,289 | 5  | 96,790             | 2003 – 2009 | 2  | 0.10 – 0.19 | 0.27 – 0.30 | [13] |
| Cattle                               | 787   | 16 | 35,074             | 2000 - 2015 | 1  | 0.02        | 0.45        | [18] |
| Pigs                                 | 2,862 | 19 | 210,733            | 1990 - 1997 | 31 | 0.49        | NA          | [19] |
| Pigs                                 | 3,675 | 14 | 215,830            | 2000 – 2005 | 23 | 0.13 – 0.23 | 0.37 – 0.38 | [35] |
| Percentage Post Thaw Motility (%)    |       |    |                    |             |    |             |             |      |
| Sheep                                | 483   | 2  | 483 (2 age groups) | 1992 – 1993 | 1  | 0.32 – 0.16 | NA          | [14] |
| Sheep                                | 3,289 | 5  | 96,790             | 2003 – 2009 | 2  | NA          | NA          | [13] |
| Cattle                               | 787   | 16 | 23,614             | 2000 - 2015 | 1  | 0.25        | 0.42        | [18] |
| Pigs                                 | 2,862 | 19 | 210,733            | 1990 - 1997 | 31 | 0.38        | NA          | [19] |
| Pigs                                 | 3,675 | 14 | 215,830            | 2000 – 2005 | 23 | 0.06 – 0.16 | 0.29 – 0.35 | [35] |
